# Supplementary material for: The Content of Anthocyanins in Cowpea (Vigna unguiculata (L.) Walp.) Seeds and Contribution of the MYB Gene Cluster to Their Coloration Pattern
Source: MDPI journal article supplement (doi:10.3390/plants12203624), 2023-10-20
Supplement: s1 [file s1]

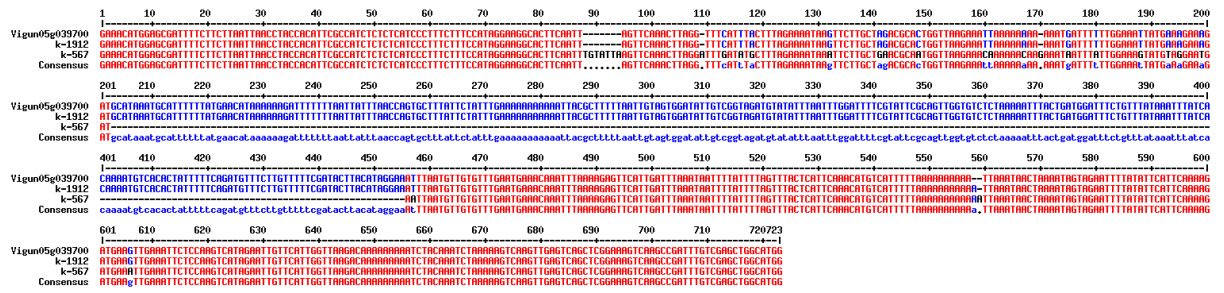

**Figure S2.** Alignment of intergenic region between *Vigun05g039700* and *Vigun05g039800* genes in k-1912 and k-567 accessions generated using the MULTALIN v5.4.1. Deletion in 253 bp was identified for accession k-567.
