# Supplementary material for: The Content of Anthocyanins in Cowpea (Vigna unguiculata (L.) Walp.) Seeds and Contribution of the MYB Gene Cluster to Their Coloration Pattern
Source: MDPI journal article supplement (doi:10.3390/plants12203624), 2023-10-20
Supplement: s1 [file s1]

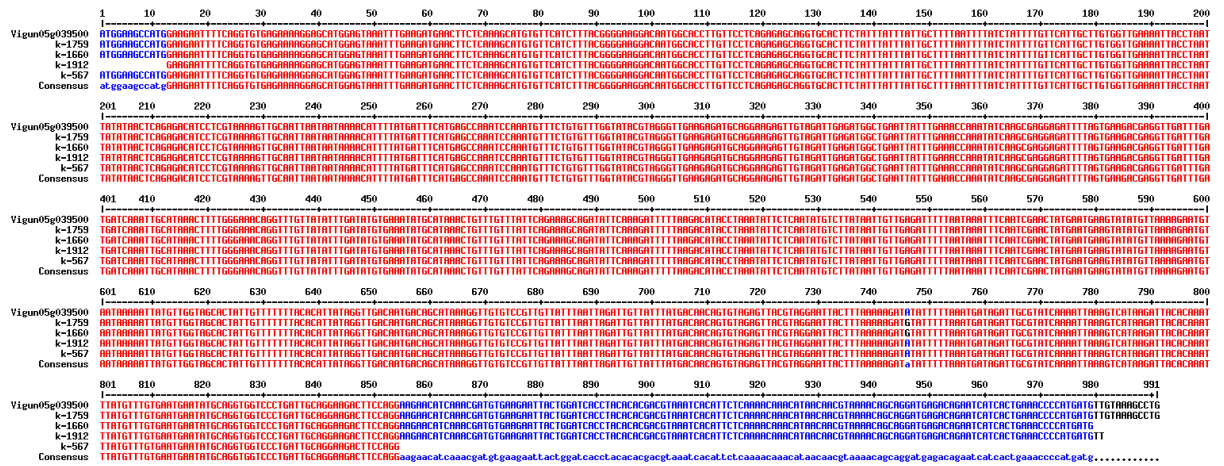

**Figure S1.** Alignment of the deduced nucleotide acid sequences of *Vigun05g039500* gene in k-1759, k-1660, k-1912 and k-567 accessions generated using the MULTALIN v5.4.1. Sequence of *Vigun05g039500* was from the database Phytosome v13.
